THE JOURNAL OF CLINICAL AND APPLIED RESEARCH AND EDUCATION

# Diabetes

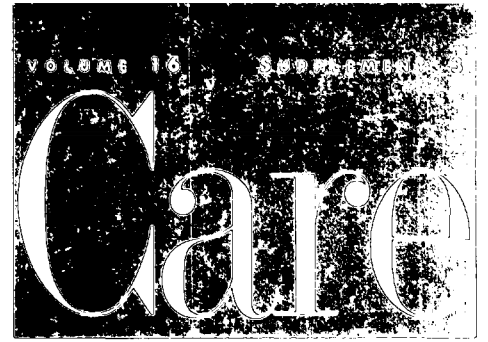

**Supplement 3**

DECEMBER 1993

## **Human Insulin**

A Decade of Experience and  
Future Developments



# **Human Insulin**

## A Decade of Experience and Future Developments

**Guest Editors: Jay Skyler, MD, Wilhelm Erkelens, and  
Dorothy Becker, MBBCH**

Publication of this supplement is made possible through an educational grant  
from Eli Lilly and Company.

# Diabetes Care

## American Diabetes Association Officers 1992-93

### Chair of the Board

MICHAEL A. GREENE

### President

JAMES R. GAVIN III, MD, PHD

### Senior Vice-President

PATRICIA D. STENGER, RN, CDE

### Chair of the Board-Elect

DOUGLAS E. LUND

### President-Elect

KATHLEEN L. WISHNER, PHD, MD

### Senior Vice-President-Elect

LINDA M. SIMINERIO, RN, MS, CDE

### Vice-Chair of the Board

DAVID H. McCLURE

### Vice-President

FRANK VINICOR, MD

### Vice-President

DAVIDA F. KRUGER, MSN, C, RN, CDE

### Secretary

SARA NOLEN

### Treasurer

STEPHEN J. SATALINO

### Office of the Executive

JOHN H. GRAHAM IV

RICHARD KAHN, PHD

CAROLINE STEVENS

*Diabetes Care* is a journal for the health-care practitioner that is intended to increase knowledge, stimulate research, and promote better management of people with diabetes mellitus. To achieve these goals, the journal publishes original articles on human studies in the areas of epidemiology, clinical trials, behavioral medicine, nutrition, education, health-care delivery, medical economics, and clinical care. The journal also publishes clinically relevant review articles, clinical observations, letters to the editor, and public health/medical news or points of view. Topics covered are of interest to clinically oriented physicians, researchers, epidemiologists, psychologists, diabetes educators, and other professionals.

All manuscripts and other editorial correspondence should be sent by first class mail to Allan L. Drash, MD, Editor, *Diabetes Care*, Children's Hospital, Rangos Research Center, 3705 Fifth Avenue, Pittsburgh, PA 15213.

*Diabetes Care* publishes only original material. When submitting a manuscript, authors must state in their transmittal letter that the material has not been previously published or is not currently being submitted to another journal.

Manuscripts should be prepared in accord with the requirements specified in the document "Uniform Requirements for Manuscripts Submitted to Biomedical Journals," *New England Journal of Medicine* 324:424-428, 1991. "Instructions for Authors" containing specifications for manuscript preparation appears in the January and July issues.

All material published in *Diabetes Care* is copyrighted by the American Diabetes Association, Inc. All manuscripts submitted to *Diabetes Care* must include a transmittal letter stating the following before they will be considered for publi-

cation. "In consideration of ADA reviewing my (our) submission, the undersigned author(s) transfers, assigns, or otherwise conveys all copyright ownership to ADA in the event the work is published." Permission to reproduce copyrighted material from *Diabetes Care* will be granted for limited, noncommercial purposes. Permission requests should be addressed to the Permissions Editor, ADA, 1660 Duke St., Alexandria, VA 22314 and should be accompanied by a letter of permission from the senior author of the article.

*Diabetes Care* (ISSN 0149-5992) is published monthly by the American Diabetes Association, Inc., 1660 Duke Street, Alexandria, VA 22314. Individual subscription rates are \$75 in the U.S., Canada, and Mexico (for Canada add 7% GST) and \$130 for all other countries. Professional membership includes \$50 designated for *Diabetes Care*. Single issues are \$8 in the U.S., Canada and Mexico (Canada add 7% GST) and \$24.75 in all other countries. Second class postage paid at Alexandria, VA 22314, and at additional mailing offices. POSTMASTER: Send change of address to *Diabetes Care*, American Diabetes Association, Inc., Journal Subscriptions, Dept. 0028, Washington, DC 20073-0028.

*Diabetes Care* is listed in Science Citation Index, Current Contents/Life Sciences, Current Contents/Clinical Medicine, SCISEARCH, ISI/BIOMED databases, and Automatic Subject Citation Alert. *Diabetes Care* is available online on BRS Colleague. For more information call 800-468-0908. It is also available in machine-readable format from University Microfilms International. *Diabetes Care* is printed on acid-free paper starting with Vol. 11(1), 1988.

© 1993 by the American Diabetes Association, Inc. Printed in the USA.

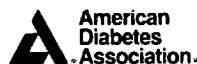





## Contents

- 1** Introduction: Human insulin after 10 years *J.S. Skyles*
- 4** The history of insulin *M. Bliss*
- 8** Gestational diabetes *D.R. Coustan*
- 16** New directions in drug development: mixtures, analogues, modeling  
*J.A. Galloway*
- 24** Insulin regimens and strategies for IDDM *B. Zinman*
- 29** Insulin therapy in type II diabetes *V.A. Koivisto*
- 40** Hypoglycemia unawareness in IDDM *P.E. Cryer*
- 48** Physiological responses to hypoglycemia: Counterregulation and cognitive function  
*S.A. Amiel, E. Gale*
- 56** Hyperinsulinemia—how innocent a bystander? *P.Z. Zimmet*
- 71** Nocturnal blood glucose control in type I diabetes mellitus *G.B. Bolli, G. Perriello, Carmine G. Fanelli, P. De Feo*
- 90** Clinical pharmacology of human insulin *L. Heinemann, Bernd Richter*
- 101** Growth and the child with diabetes mellitus *W.L. Clarke, M.L. Vance, A.D. Rogol*
- 107** Sweet success with diabetes: The development of insulin therapy and glycemic control for pregnancy *J.L. Kitzmiller*
- 122** Future developments in insulin delivery systems *C.D. Saudek*
- 133** Research, development, production, and safety of biosynthetic human insulin *R.E. Chance, B.H. Frank*
- 143** Insulin therapy in the last decade: A pediatric perspective *J.V. Santiago*
- 155** Immunogenicity and allergenic potential of animal and human insulins  
*G. Schemthaner*

### Editor in Chief

ALLAN L. DRASH, MD

### Associate Editors

SILVA ARSLANIAN, MD  
DOROTHY BECKER, MBBCH  
JOSE F. CARO, MD  
DONALD R. COUSTAN, MD  
DAVID E. KELLEY, MD  
RONALD E. LAPORTE, PHD  
TREVOR ORCHARD, MD  
LINDA SIMINERIO, RN  
RENA R. WING, PHD

### Editorial Assistant

SARAH ORSCHIEDT

### Editorial Board

ALAIN D. BARON, MD  
MICHAEL BERELOWITZ, MD  
DENNIS BIER, MD  
ZACHARY BLOOMGARDEN, MD  
H. PETER CHASE, MD  
DENIS DANEMAN, MD  
FRANCISCO J. GOMEZ-PEREZ, MD  
LINDA GONDER-FREDERICK, PHD  
DOUGLAS A. GREENE, MD  
LEIF GROOP, MD  
STEVEN M. HAFNER, MD  
JEFFREY B. HALTER, MD  
CLARISSA S. HOLMES, PHD  
RODWIN A. JACKSON, MD  
ALAN M. JACOBSON, MD  
JOHN KITZMILLER, MD  
ORVILLE G. KOLTERMAN, MD  
WEMARA LICHTY, PHD  
MARIA LOPES-VIRELLA, MD, PHD  
WILLIAM J. RILEY, MD  
ARLAN L. ROSENBLUM, MD  
CHRISTOPHER P. SAUDEK, MD  
DAVID S. SCHADE, MD  
JAY M. SOSENKO, MD  
WILLIAM V. TAMBORLANE, MD  
NELSON B. WATTS, MD  
RENA R. WING, PHD

### Publisher

SUSAN H. LAU

### Editorial Director

PETER BANKS

### Managing Editor

MATT PETERSEN

### Assistant Managing Editor

SARAH L. ROBERTS

### Production Editor

STACEY N. WAGES

### Assistant Editors

KAREN L. INGLE  
CHRISTIANN L. SHORTRIDGE

### Director of Membership/ Subscription Services

GARY FRISCH

### Customer Service Manager

STEPHEN LASEAU

### Director of Advertising and Marketing

LEN BOSWELL

### Advertising Manager

PEGGY B. ABBOTT

### Advertising Assistant

PATTI THOMPSON

### Advertising Representatives

Pharmaceutical Media, Inc.  
440 Park Avenue South  
New York, NY 10016  
(212) 685-5010
